# Supplementary material for: LIM and cysteine-rich domains 1 (LMCD1) regulates skeletal muscle hypertrophy, calcium handling, and force
Source: Skelet Muscle. 2019 Oct 31;9:26. doi: 10.1186/s13395-019-0214-1 (PMC6822430; doi:10.1186/s13395-019-0214-1)
Supplement: Supplementary file 1 — Additional file 1: Table S1. Primers used for detection of gene expression by qRT-PCR. [file 13395_2019_214_MOESM1_ESM.xlsx]

## Sheet: Table S1
Additional file 1: Table S1: Primers used for detection of gene expression by qRT-PCR
Gene	Fw Primer	Rv Primer	Function
mouse Lmcd1	CACTATCACCTACGAGTGGGC	TCTCCTTGGGGATGAGTTCCA	Regulators of muscle
human Lmcd1	GGACCACTGCCTAACATCTGA	CCGGTTCCTCTTGTAAATCCG
Pgc-1a1	GCGGCGGCCGCGATGGCTTGGGACATGTGC	GCGGGATCCTTACCTGCGCAAGCTTCTC
Pgc-1a4	TCACACCAAACCCACAGAAA	CTGGAAGATATGGCACAT
Myostatin	AGTGGATCTAAATGAGGGCAGT	GTTTCCAGGCGCAGCTTAC
Igf1	CTGGACCAGAGACCCTTTGC	GGACGGGGACTTCTGAGTCTT
Atrogin	CCATCAGGAGAAGTGGAGCTATGTT	GCTTCCCCCAAAGTGCAGTA
Murf1	AGGACAACCTCGTGCCTACAAG	ACAACCTGTGCCGCAAGTG
Kdel	CATTTCAGGGAAGAGCCAAGT	CTTCATGCAGGTGTTGTAGAGT	ER Stress
Hsp90aa1	AATTGCCCAGTTAATGTCCTTGA	CGTCCGATGAATTGGAGATGAG
Atf6	AGCGCCCAAGACTCAAACC	CTGTATGCTGATAATCGACTGCT
Xbp1t	GAGCAGCAAGTGGTGGATTT	CCGTGAGTTTTCTCCCGTAA
Xbp1s	GAGTCCGCAGCAGGTG	GTGTCAGAGTCCATGGGA
Atf4	AAGGAGGAAGACACTCCCTCT	CAGGTGGGTCATAAGGTTTGG
Gadd34	GAGGGACGCCCACAACTTC	TTACCAGAGACAGGGGTAGGT
Bip	GCATCACGCCGTCGTATGT	ATTCCAAGTGCGTCCGATGAG
Chop	CTGGAAGCCTGGTATGAGGAT	CAGGGTCAAGAGTAGTGAAGGT
Grp94	TCGTCAGAGCTGATGATGAAGT	GCGTTTAACCCATCCAACTGAAT
Erdj4	CTCCACAGTCAGTTTTCGTCTT	GGCCTTTTTGATTTGTCGCTC
Atf3	GCTGCCAAGTGTCGAAACAAG	CAGTTTTCCAATGGCTTCAGG
Myh I	CCTTGGCACCAATGTCCCGGCTC	GAAGCGCAATGCAGAGTCGGTG	Thick filaments
Myh II a	ATGAGCTCCGACGCCGAG	TCTGTTAGCATGAACTGGTAGGCG
Myh II b	GTGATTTCTCCTGTCACCTCTC	GGAGGACCGCAAGAACGTGCTGA
Myh II x	GCGAATCGAGGCTCAGAACAA	GTAGTTCCGCCTTCGGTCTTG
Myl1	AAGATCGAGTTCTCTAAGGAGCA	TCATGGGCAGAAACTGTTCAAA
Myl3	TGCCTCCAAGATTAAGATCGAGT	CTCTGCCTGGGTAGGATTCTG
Myl4	AGAAACCCGAGCCTAAGAAGG	TGGAGTCCGGTCAAACAATGA
Myl2	ATCGACAAGAATGACCTAAGGGA	ATTTTTCACGTTCACTCGTCCT
Mybpc1	TGTAGCCAAAGTTAGGGCTGA	GTTTGCCTCTCGAAGGTCTCC
Mybpc2	ATGCCTGAGGCTAAACCAGC	ACACAGAGTCCGGCTTTTTCA
Titin	GACACCACAAGGTGCAAAGTC	CCCACTGTTCTTGACCGTATCT
Acta1	TACCACCGGCATCGTGTTG	GCGCACAATCTCACGTTCAG	Thin filaments
Tpm1	TTGAAAGCCGAGCCCAAAAAG	TCATACTTCCGGTCAGCATCTT
Tpm2	GTGGCTGAGAGTAAATGTGGG	TTGGTGGAATACTTGTCCGCT
Tpm3	AGAGGATGAACTAGCAACCATGC	CTTCCGAATACTTGTCCAGCTC
Tnnt1	CCTGTGGTGCCTCCTTTGATT	TGCGGTCTTTTAGTGCAATGAG
Tnnt3	GGGATACCTTGTACCAACTGGA	AGTCAGGGTTGATGGTCTCTG
Tnni1	GCTGAGAAGGTGCGTTACCTC	AGCTCTCGGCACAAGTCCT
Tnni2	GCACCTGAAGAGTGTGATGCT	TCTCCTTCTCAGATTCTCGGC
Tnnc1	GCCACAGGTGAGACCATTACG	ATTCGGCCATCGTTGTTCTTG
Tnnc2	GAGGCCAGGTCCTACCTCAG	GGTGCCCAACTCTTTAACGCT
Neb	TCCGAAAGAAGGTGGACTCGT	TGCGAAGTTCTGGAGTATCACT
Actn2	TGGCACCCAGATCGAGAAC	GTGGAACCGCATTTTTCCCC	Z Disc related genes
Actn3	AACAGCAGCGGAAAACCTTCA	GGCTTTATTGACATTGGCGATTT
Tcap	GATGCGCCTGGGTATCCTC	GATCGAGACAGGGTACGGC
Flnc	GAAGGCCAACATCCGAGACAA	AGGGCGAGTAAGGGATCTCAT
Myoz1	CAGCTCAATGGATCACTTCCAG	TGATGACGGTCAGAGCCATAC
Myoz2	GCATCAGCCATCACGAAGGAA	CCACGATTACTGAAATGGGACA
Myoz3	GCTGTCTCTACGAAACAACCG	ATGGCCTGCAAACTTTCTGAT
Mypn	GAGGTCCGGCCAGTCCTAA	GAAAGTTCTTCGATGAAATCGGC
Myot	TTACCGTCTCAACCCGATTACT	TTTGGAGTGGGCCTAGCATTT
Ldb3	TCCCGTGGAGAATCCGAGG	AGTTGGACTGTAATTGGCTCCT
Gata2	CACCCCGCCGTATTGAATG	CCTGCGAGTCGAGATGGTTG	LMCD1 known interactors
Gata4	CACCCCAATCTCGATATGTTTGA	GCACAGGTAGTGTCCCGTC
Gata6	TTGCTCCGGTAACAGCAGTG	GTGGTCGCTTGTGTAGAAGGA
Calcineurin	CTGGCTGCGCTAATGAACCA	GGTCTGACCATAGGATGTCACAC	Calcium related genes
Calr	AAGATGCCCGATTTTACGCAC	CCCACAGTCGATATTCTGCTC
Calr 3 isoform 1	TGGCACTAGCCACTGTGTACT	TCCCCGATGAGACTCTGAAGT
Calr 3 isoform 2	GTGGGGCAGGATGCTTAGG	TCAGGGTGTAGAGATGCGTGA
Calr 4	TTTCCACCAGGTTTAAGCCATT	TGCCTTGCTCGTGTTTTACTG
Rcan I	CCAGTGTGGTGGTCCACGTG	GGTGGATGGGTGTGTACTCCG
Mln	CAACGTTGCTAGGAGAACACC	GCTCTTGCCACTCATGTTCA
Serca 1	GGAATGCAGAGAACGCTATCG	TCCTTTGCACTGACTTTCGGT
Serca 2	GAGAACGCTCACACAAAGACC	CAATTCGTTGGAGCCCCAT
Serca 3	CCTGGTCATCATGCTAATTCTCG	ACCGGATCACCTTACCCATCT
Pmca 1	ACCTGTAGCTGACATTACTGTTG	ACCTTCCATCACATGAGTACCT
Pmca 3	CCCCAAAGCAGCCTAAGACC	CTCCAGGAGGTGCATAGAAGG
Pmca 4	CCAGGACAAAGCGTGTCAG	CAGGTCCATTAAGGTGCAGC
Na/Ca Exc 1	CTTCCCTGTTTGTGCTCCTGT	AGAAGCCCTTTATGTGGCAGTA
Na/Ca Exc 2	TGGGTGTGTCTATCATTGCCG	CAGACCTCGATGACAGTCAAC
Na/Ca Exc 3	GTGAACCGAAATGGATGGAACG	TCACCCAATACTGGCTTTCCC
Na/K/Ca Exc 2	AGGTGCCATCATTCTGCATGT	AGACCCCTATAAGAGACGTGAAA
Na/K/Ca Exc 3	CCCAGGGACATCTTCTCCAAT	GATCTTTTCCAAGGATGGGACG
Na/K/Ca Exc 4	GATTCTCAGCTCTAGCCCTCC	GCCATCCGTAGTCGAGTCCT
Na/K/Ca Exc 5	TTTGGGTCTCTGCATACCTGC	CGGGAAACTCCGATGCTGG
